# Supplementary material for: A mitochondria-targeted near-infrared probe for colorimetric and ratiometric fluorescence detection of hypochlorite in living cells
Source: Royal Society of Chemistry journal article supplement (doi:10.1039/c6ra22868b), 2016-01-01
Supplement: c6ra22868b1.pdf [file c6ra22868b1.pdf]

## Electronic Supplementary Information

# A mitochondria-targeted near-infrared probe for colorimetric and ratiometric fluorescence detection of hypochlorite in living cells

Junchao Xu,<sup>ac</sup> Houqun Yuan,<sup>b</sup> Caiqin Qin,<sup>a</sup> Lintao Zeng<sup>\*ac</sup> and Guang-Ming Bao<sup>\*b</sup>

<sup>a</sup> Department of Chemistry and Materials Sciences, Hubei Engineering University, Xiaogan 432100, P.R. China. E-mail: zlt1981@126.com (L. Zeng).

<sup>b</sup> College of Animal Science and Technology, Jiangxi Agricultural University, Nanchang 330045, P.R. China. Email: bycb2005@gmail.com (G.-M. Bao).

<sup>c</sup> School of Chemistry and Chemical Engineering, Tianjin University of Technology, Tianjin 300384, P.R. China.

## Contents

1. <sup>1</sup>H NMR, <sup>13</sup>C NMR and HR-MS spectra of **CMBI**
2. Summary of photophysical properties
3. Ratiometric response of **CMBI** toward ClO<sup>-</sup> at low concentrations
4. Selectivity of **CMBI** toward ClO<sup>-</sup>
5. Kinetics research for **CMBI** towards ClO<sup>-</sup>, HSO<sub>3</sub><sup>-</sup> and HS<sup>-</sup>
6. Proposed sensing mechanism
7. Cell toxicity test of **CMBI**
8. Comparison of ratiometric fluorescent probes for ClO<sup>-</sup>
9. <sup>1</sup>H NMR spectra of compounds **1** and **2**

# 1. <sup>1</sup>H NMR, <sup>13</sup>C NMR and HR-MS spectra of CMBI

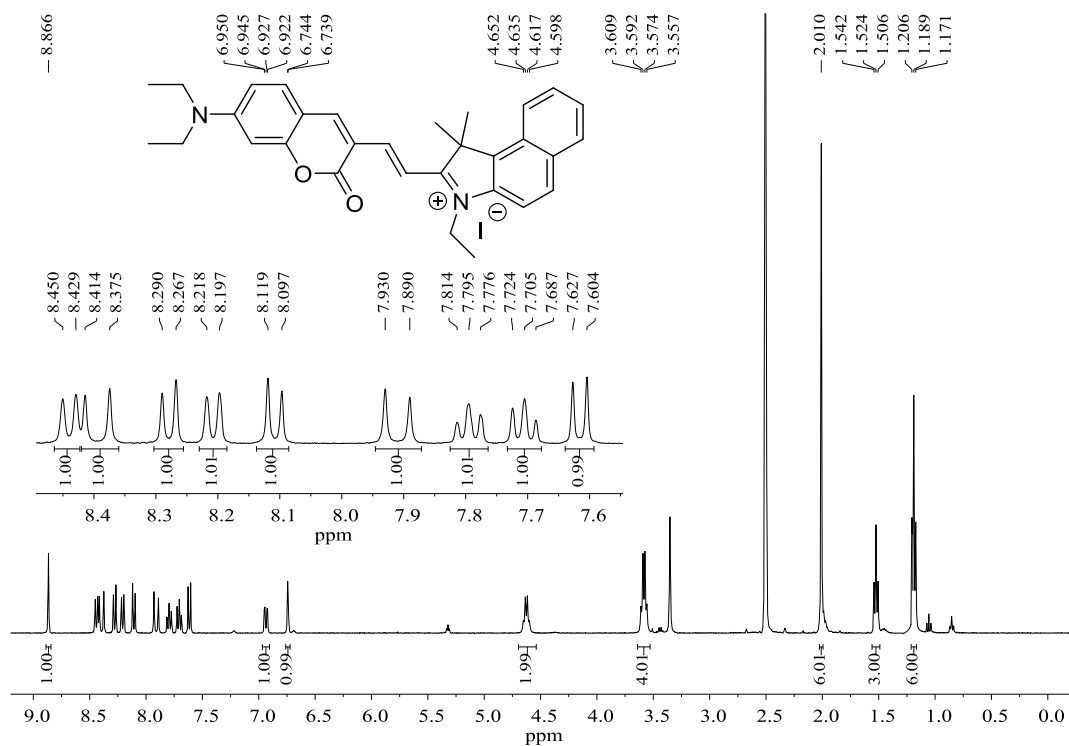

Fig. S1 <sup>1</sup>H NMR spectrum of CMBI in DMSO-*d*<sub>6</sub> (400 MHz).

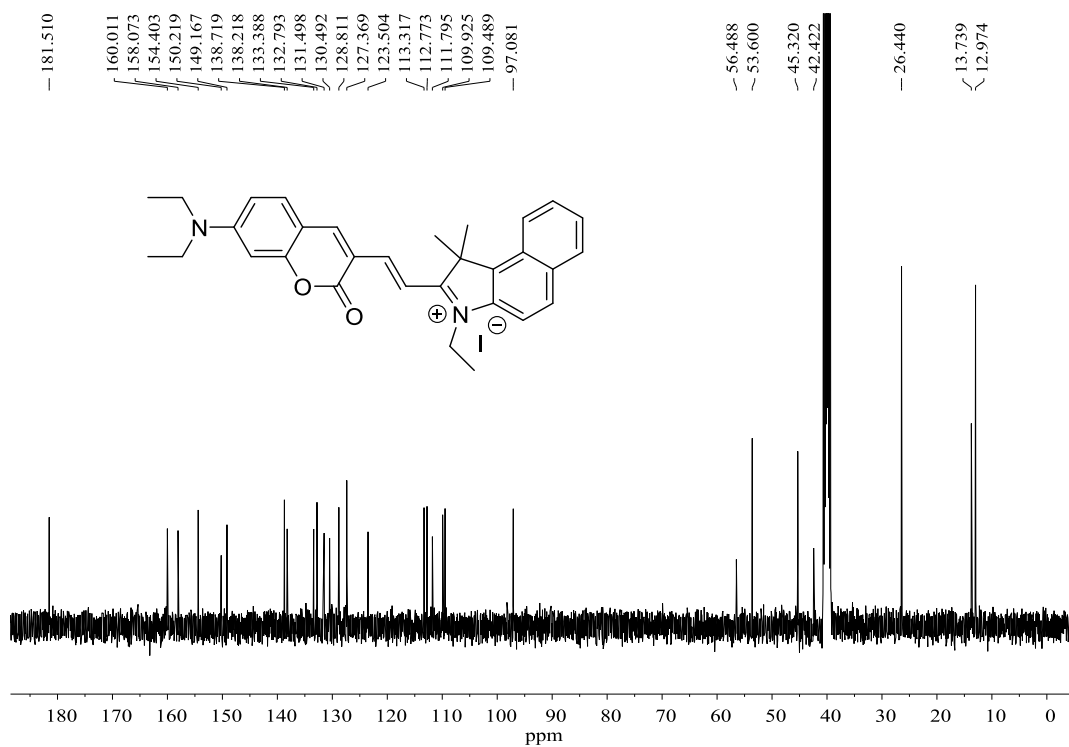

Fig. S2 <sup>13</sup>C NMR spectrum of CMBI in DMSO-*d*<sub>6</sub> (100 MHz).

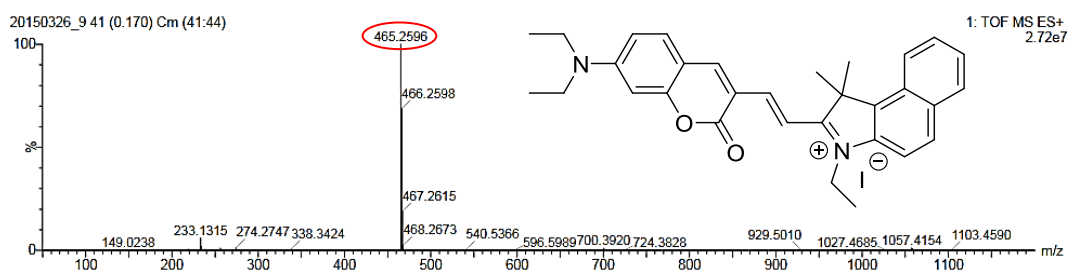

**Fig. S3** HR-MS (ESI) spectrum of **CMBI**.

## 2. Summary of photophysical properties

**Table S1** Spectroscopic properties of **CMBI** (10  $\mu\text{M}$ ) and **CMBI** (10  $\mu\text{M}$ ) with  $\text{ClO}^-$  (100  $\mu\text{M}$ ) in EtOH/PBS solution ( $v/v = 1/9$ , pH 7.4, 10 mM).

| Compound                     | $\lambda_{\text{abs}}$ (nm) | $\lambda_{\text{em}}$ (nm) | $\Phi$ | $\Delta\nu$ ( $\text{cm}^{-1}$ ) |
|------------------------------|-----------------------------|----------------------------|--------|----------------------------------|
| <b>CMBI</b>                  | 592                         | 658                        | 0.012  | 1694                             |
| <b>CMBI</b> + $\text{ClO}^-$ | 400                         | 475                        | 0.141  | 3947                             |

## 3. Ratiometric response of **CMBI** toward $\text{ClO}^-$ at low concentrations

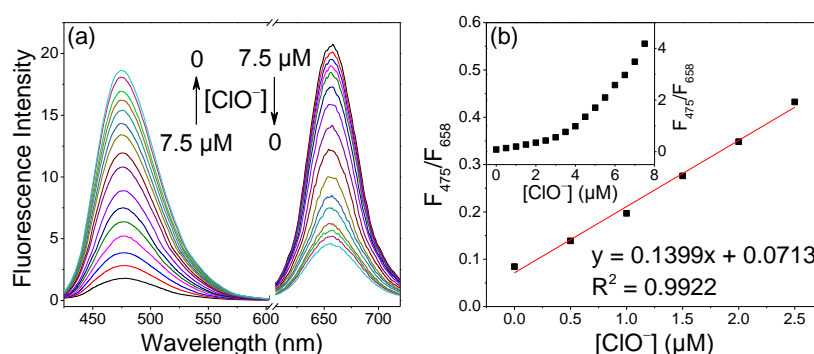

**Fig. S4** (a) Fluorescence spectra changes of 1  $\mu\text{M}$  **CMBI** in EtOH/PBS solution ( $v/v = 1/9$ , pH 7.4, 10 mM) upon addition of increasing amount of  $\text{ClO}^-$  (0 – 7.5  $\mu\text{M}$ ). (b) Linear relationship between fluorescence intensity of 1.0  $\mu\text{M}$  **CMBI** *versus* concentrations of  $\text{ClO}^-$  in EtOH/PBS solution ( $v/v = 1/9$ , pH 7.4, 10 mM). Each spectrum was recorded after 3 min.

#### 4. Selectivity of CMBI toward $\text{ClO}^-$

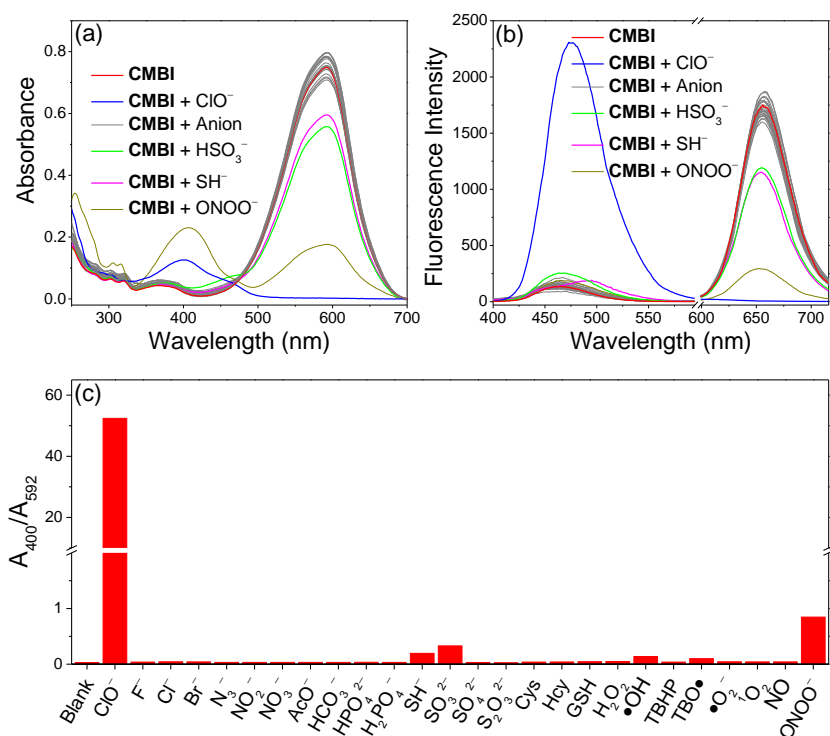

**Fig. S5** (a) UV-vis absorption, (b) fluorescence spectra changes and (c) UV-vis absorption ratios ( $A_{400}/A_{592}$ ) of 10  $\mu\text{M}$  CMBI in EtOH/PBS solution ( $v/v = 1/9$ , pH 7.4, 10 mM) in the presence of various small molecular species (500  $\mu\text{M}$ ) and ROS/RNS (100  $\mu\text{M}$ ). Each spectrum was recorded after 3 min.

## 5. Kinetics research for CMBI towards $\text{ClO}^-$ , $\text{HSO}_3^-$ and $\text{HS}^-$

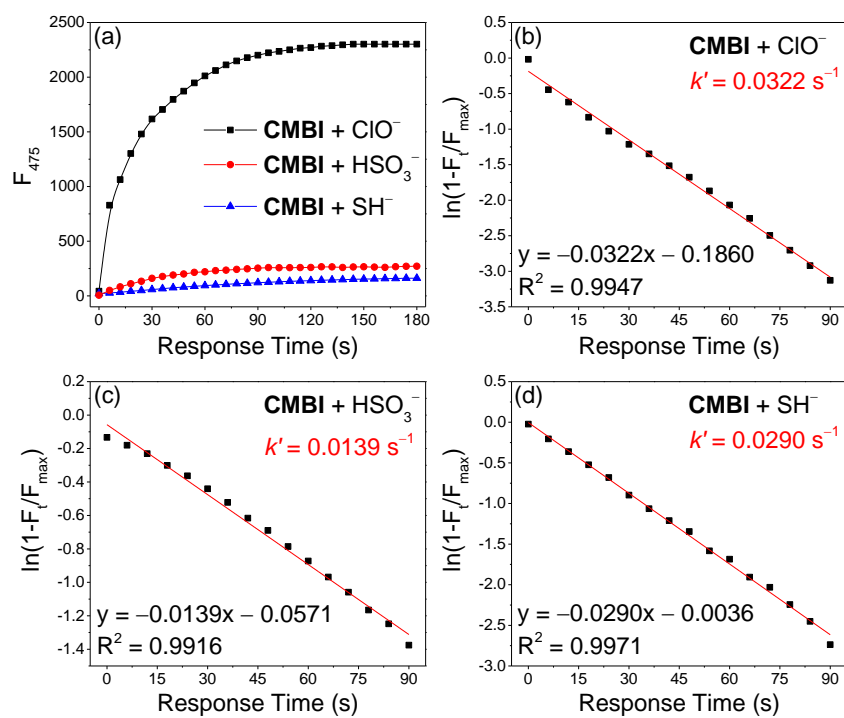

**Fig. S6** Time-resolved fluorescence responses (a) and Pseudo-first-order kinetic plot of 10  $\mu\text{M}$  CMBI towards 100  $\mu\text{M}$   $\text{ClO}^-$  (b),  $\text{HSO}_3^-$  (c) and  $\text{SH}^-$  (d) in EtOH/PBS solution (v/v = 1/9, pH 7.4, 10 mM).

## 6. Proposed mensing mechanism

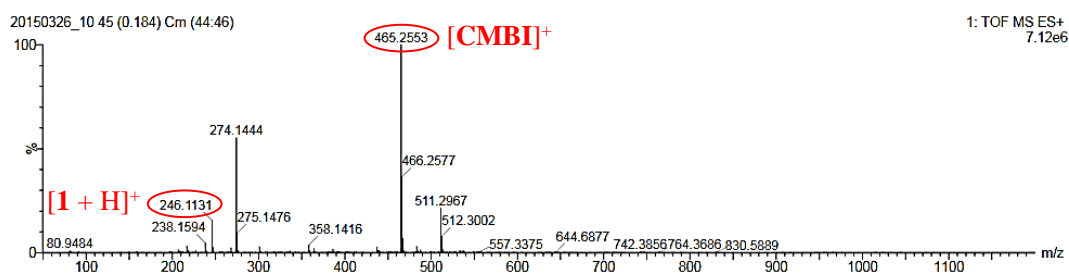

**Fig. S7** HR-MS (ESI) spectrum of **CMBI** with  $\text{ClO}^-$ .

## 7. Cell toxicity test of CMBI

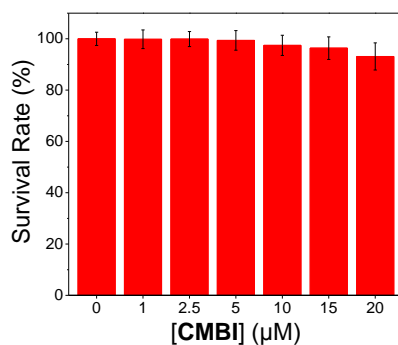

**Fig. S8** Cell toxicity effect of **CMBI**. HeLa cells were incubated with **CMBI** (0–20  $\mu\text{M}$ ) for 24 h. Results are mean  $\pm$  SD,  $n = 3$ .

## 8. Comparison of ratiometric fluorescent probes for ClO<sup>-</sup>

**Table S2** Comparison of ratiometric fluorescent probes for ClO<sup>-</sup>

| Probes                                                | $\lambda_{\text{ex}}$<br>/nm | $\lambda_{\text{em}}$<br>/nm | Reagents                                       | Detection<br>limit/nM | Response<br>time/s | Application                                                    |
|-------------------------------------------------------|------------------------------|------------------------------|------------------------------------------------|-----------------------|--------------------|----------------------------------------------------------------|
| Phenanthroimidazole<br>Probe <b>1</b> <sup>[1]</sup>  | 394                          | 439<br>509                   | pH 9.0 PBS<br>(80% DMF)                        | —                     | Within<br>seconds  | —                                                              |
| <b>1b</b> <sup>[2]</sup>                              | 540<br>464                   | 585<br>505                   | pH 7.4 PBS<br>(20% DMF)                        | 200                   | < 600              | MCF-7 cells (Ex)<br>Ex = exogenous                             |
| <b>Cou-Rho-HOCl</b> <sup>[3]</sup>                    | 410                          | 473<br>594                   | pH 7.4 PBS<br>(50% DMF)                        | 52                    | < 60               | Bel 7702 cells (Ex)<br>RAW 264.7 cells (En)<br>En = endogenous |
| BODIPY-DCDHF<br>Probe <b>1</b> <sup>[4]</sup>         | 465                          | 629<br>520                   | pH 7.4 PBS<br>(1% EtOH, 0.1 %<br>Triton X-100) | 500                   | ~ 400              | RAW 264.7 cells (Ex, En)                                       |
| <b>Cy7-NR1</b> <sup>[5]</sup>                         | 540                          | 780<br>566                   | pH 7.4 PBS<br>(0.5% DMF)                       | 19.5                  | ~ 360              | HeLa cells (Ex)                                                |
| <b>Z2</b> <sup>[6]</sup>                              | 460                          | 509<br>600                   | pH 7.4 PBS                                     | 63                    | < 120              | Test paper                                                     |
| <b>CDH</b> <sup>[7]</sup>                             | 316                          | 376<br>456                   | pH 7.4 HEPES<br>(40% CH <sub>3</sub> CN)       | 1070                  | < 60               | Water samples<br>TLC plate strips                              |
| <b>HRS1</b> <sup>[8]</sup>                            | 410<br>554                   | 501<br>578                   | pH 8.5 PBS<br>(40% DMF)                        | 24                    | < 60               | Water samples                                                  |
| <b>DPNO</b> <sup>[9]</sup>                            | 305                          | 354<br>430                   | pH 7.4 HEPES<br>(60% CH <sub>3</sub> CN)       | 56                    | < 60               | Water samples<br>TLC plate strips                              |
| <b>DPH</b> <sup>[10]</sup>                            | 344                          | 495<br>375                   | pH 7.4 HEPES<br>(50% EtOH)                     | 350                   | —                  | Water samples                                                  |
| <b>CMCY</b> <sup>[11]</sup>                           | 460                          | 631<br>480                   | pH 7.4 PBS                                     | 80                    | < 120              | HeLa cells (Ex)                                                |
| Coumarin-Pyridinium<br>Probe <b>1</b> <sup>[12]</sup> | 420                          | 631<br>488                   | pH 7.4 PBS<br>(75% THF)                        | 93                    | ~ 20               | Water samples<br>RAW 264.7 cells (En)                          |
| 1,8-diaminonaphthalene <sup>[13]</sup>                | 325                          | 440<br>518                   | pH 7.0 HEPES                                   | 20                    | < 20               | Water samples<br>HepG2 cells (Ex)                              |
| Coumarin-Rhodamine<br>Probe <b>2</b> <sup>[14]</sup>  | 410                          | 580<br>470                   | pH 5.0 PBS<br>(40% DMF)                        | —                     | < 50               | RAW 264.7 cells (En)                                           |

|                                           |     |            |                                                 |      |                   |                                         |
|-------------------------------------------|-----|------------|-------------------------------------------------|------|-------------------|-----------------------------------------|
| <b>BTHT</b> <sup>[15]</sup>               | 365 | 562<br>476 | pH 7.4 HEPES<br>(50% CH <sub>3</sub> CN)        | 140  | < 480             | Water samples<br>TLC plate strips       |
| <b>NIR-1</b> thiospirolactone             | 430 | 486        | pH 7.4 PBS                                      | 40   | Within<br>seconds | Water samples                           |
| Probe <b>1</b> <sup>[16]</sup>            | 650 | 707        | (30% CH <sub>3</sub> CN)                        |      |                   | HeLa cells (Ex)<br>RAW 264.7 cells (En) |
| <b>TAM</b> <sup>[17]</sup>                | 430 | 630<br>485 | pH 7.1 H <sub>2</sub> O<br>(40% THF)            | 70   | ~ 100             | TLC plate strips<br>PBMCs (Ex)          |
| Dansyl-Rhodamine                          | 400 | 494        | pH 8.0 PBS                                      | 1130 | < 120             | Water samples                           |
| Probe <b>1</b> <sup>[18]</sup>            |     | 578        | (10% CH <sub>3</sub> CN)                        |      |                   | Test paper                              |
| <b>PMN-TPP</b> <sup>[19]</sup>            | 410 | 522<br>640 | pH 7.3 PBS<br>(0.5% DMSO, 1 mM<br>Triton X-100) | 430  | Few<br>seconds    | RAW 264.7 cells (En)<br>Nude mouse (En) |
| <b>Naph-Rh</b> <sup>[20]</sup>            | 350 | 440<br>585 | pH 6.0 PBS<br>(30% EtOH)                        | 100  | < 50              | RAW 264.7 cells (En)                    |
| <b>RMClO-2</b> <sup>[21]</sup>            | 412 | 476        | pH 7.4 PBS                                      | 0.84 | Within<br>seconds | Normal and cancer cells                 |
|                                           | 540 | 570        | (0.1% DMSO)                                     |      |                   |                                         |
| <b>HPQ-Cy<sub>2</sub></b> <sup>[22]</sup> | 365 | 575<br>435 | pH 7.4 PBS<br>(0.5% EtOH)                       | 28   | < 50              | A375 cells (En)                         |
| <b>CRSH</b> <sup>[23]</sup>               | 350 | 470<br>580 | pH 5.0 PBS<br>(50% EtOH)                        | 210  | ~ 60              | RAW 264.7 cells (En)                    |
| <b>STBR</b> <sup>[24]</sup>               | 370 | 514<br>595 | pH 7.5 PBS<br>(20% CH <sub>3</sub> CN)          | 220  | —                 | TLC plate strips<br>Baker's yeast (Ex)  |
| <b>AETU-HOCI</b> <sup>[25]</sup>          | 380 | 533<br>473 | pH 7.4 PBS<br>(50% EtOH)                        | 3.9  | ~ 60              | RAW 264.7 cells (En)                    |
| <b>QC1</b> <sup>[26]</sup>                | 400 | 482<br>381 | pH 7.4 HEPES<br>(1% DMSO)                       | 410  | —                 | —                                       |
| Naphthalimide-Indolium                    | 430 | 620        | pH 7.0 HEPES                                    | 53   | ~ 50              | HepG2 cells (Ex)                        |
| Probe <b>1</b> <sup>[27]</sup>            |     | 515        | (50% MeOH)                                      |      |                   |                                         |
| <b>HES-BODIPY</b> <sup>[28]</sup>         | 480 | 562<br>532 | pH 7.1 PBS<br>(10% EtOH)                        | 430  | Within<br>seconds | RAW 264.7 cells (En)                    |
| <b>BRT</b> <sup>[29]</sup>                | 525 | 540<br>580 | pH 5.0 PBS<br>(60% EtOH)                        | 38   | ~ 15              | RAW 264.7 cells (En)                    |
| <b>CARSH</b> <sup>[30]</sup>              | 350 | 490<br>580 | pH 5.0 PBS<br>(50% EtOH)                        | 200  | ~ 60              | RAW 264.7 cells (En)                    |
| <b>Lyso-HA</b> <sup>[31]</sup>            | 420 | 450<br>586 | pH 5.0 PBS<br>(30% DMSO)                        | 110  | Within<br>seconds | HeLa cells (Ex)<br>RAW 264.7 cells (En) |



|                               |     |     |                                      |     |       |                                                          |
|-------------------------------|-----|-----|--------------------------------------|-----|-------|----------------------------------------------------------|
| <b>MTPE-M</b> <sup>[32]</sup> | 340 | 595 | pH 7.4 PBS<br>(1% DMSO, 1mM<br>CTAB) | 470 | ~ 180 | RAW 264.7 cells (En)<br>Zebrafish (En)                   |
|                               |     | 498 |                                      |     |       |                                                          |
| <b>Py-Cy</b> <sup>[33]</sup>  | 430 | 613 | pH 7.4 PBS<br>(5% DMSO)              | 350 | 4200  | Water samples<br>HeLa cells (Ex)<br>RAW 264.7 cells (En) |
|                               |     | 470 |                                      |     |       |                                                          |
| <b>CMBI</b><br>(This work)    | 390 | 585 | pH 7.4 PBS<br>(10% EtOH)             | 33  | ~ 90  | HeLa cells (Ex)                                          |
|                               |     | 475 |                                      |     |       |                                                          |

- 1 W. Lin, L. Long, B. Chen and W. Tan, *Chem. Eur. J.*, 2009, **15**, 2305.
- 2 L. Yuan, W. Lin, J. Song and Y. Yang, *Chem. Commun.*, 2011, **47**, 12691.
- 3 L. Yuan, W. Lin, Y. Xie, B. Chen, J. Song, *Chem. Eur. J.*, 2012, **18**, 2700.
- 4 J. Park, H. Kim, Y. Choi and Y. Kim, *Analyst*, 2013, **138**, 3368.
- 5 Z. Lou, P. Li, P. Song and K. Han, *Analyst*, 2013, **138**, 6291.
- 6 Q. Wang, C. Liu, J. Chang, Y. Lu, S. He, L. Zhao and X. Zeng, *Dyes Pigm.*, 2013, **99**, 733.
- 7 S. Goswami, S. Paul and A. Manna, *Dalton Trans.*, 2013, **42**, 10097.
- 8 L. Long, D. Zhang, X. Li, J. Zhang, C. Zhang and L. Zhou, *Anal. Chim. Acta*, 2013, **775**, 100.
- 9 S. Goswami, A. Manna, S. Paul, C. K. Quah and H.-K. Fun, *Chem. Commun.*, 2013, **49**, 11656.
- 10 C.-C. Zhang, Y. Gong, Y. Yuan, A. Luo, W. Zhang, J. Zhang, X. Zhang and W. Tan, *Anal. Methods*, 2014, **6**, 609.
- 11 J. Zha, B. Fu, C. Qin, L. Zeng and X. Hu, *RSC Adv.*, 2014, **4**, 43110.
- 12 L. Wang, L. Long, L. Zhou, Y. Wu, C. Zhang, Z. Han, J. Wang and Z. Da, *RSC Adv.*, 2014, **4**, 59535.
- 13 Y. Yang, C. Yin, F. Huo, J. Chao, Y. Zhang and S. Jin, *Sens. Actuators, B*, 2014, **199**, 226.
- 14 Y.-R. Zhang, X.-P. Chen, J. Shao, J.-Y. Zhang, Q. Yang, J.-Y. Miao and B.-X. Zhao, *Chem. Commun.*, 2014, **50**, 14241.
- 15 A. Manna and S. Goswami, *New J. Chem.*, 2015, **39**, 4424.
- 16 S. Ding, Q. Zhang, S. Xue and G. Feng, *Analyst*, 2015, **140**, 4687.
- 17 S. Goswami, K. Aich, S. Das, B. Pakhira, K. Ghoshal, C. K. Quah, M. Bhattacharyya, H.-K. Fun and S. Sarkar, *Chem. Asian J.*, 2015, **10**, 694.
- 18 H. J. Lee, M. J. Cho and S.-K. Chang, *Inorg. Chem.*, 2015, **54**, 8644.
- 19 H. Xiao, J. Li, J. Zhao, G. Yin, Y. Quan, J. Wang and R. Wang, *J. Mater. Chem. B*, 2015, **3**, 1633.
- 20 Y.-R. Zhang, N. Meng, J.-Y. Miao and B.-X. Zhao, *Chem. Eur. J.* 2015, **21**, 19058.
- 21 J.-T. Hou, K. Li, J. Yang, K.-K. Yu, Y.-X. Liao, Y.-Z. Ran, Y.-H. Liu, X.-D. Zhou and X.-Q. Yu, *Chem. Commun.*, 2015, **51**, 6781.
- 22 L. Zhou, D.-Q. Lu, Q. Wang, S. Hu, H. Wang, H. Sun and X. Zhang, *Spectrochim. Acta A*, 2016, 166, 129.
- 23 Y.-R. Zhang, Z.-M. Zhao, L. Su, J.-Y. Miao and B.-X. Zhao, *RSC Adv.*, 2016, **6**, 17059.
- 24 A. Manna, D. Sarkar, S. Goswami, C. K. Quah and H.-K. Fun, *RSC Adv.*, 2016, **6**, 57417.
- 25 W. Shu, P. Jia, X. Chen, X. Li, Y. Huo, F. Liu, Z. Wang, C. Liu, B. Zhu, L. Yan and B. Du, *RSC Adv.*, 2016, **6**, 64315.
- 26 L. Wang, Y. Hu, Y. Qu, J. Xu and J. Cao, *Dyes Pigm.*, 2016, **128**, 54.
- 27 J. Li, P. Li, F. Huo, C. Yin, T. Liu, J. Chao and Y. Zhang, *Dyes Pigm.*, 2016, **130**, 209.
- 28 X. Wang, L. Zhou, F. Qiang, F. Wang, R. Wang and C. Zhao, *Anal. Chim. Acta*, 2016, **911**, 114.
- 29 Y. Liu, Z.-M. Zhao, J.-Y. Miao and B.-X. Zhao, *Anal. Chim. Acta*, 2016, **921**, 77.
- 30 Y.-R. Zhang, Z.-M. Zhao, J.-Y. Miao and B.-X. Zhao, *Sens. Actuators, B*, 2016, **229**, 408.
- 31 M. Ren, B. Deng, K. Zhou, X. Kong, J.-Y. Wang, G. Xu and W. Lin, *J. Mater. Chem. B*, 2016, **4**, 4739.
- 32 Y. Huang, P. Zhang, M. Gao, F. Zeng, A. Qin, S. Wu and Z. Tang, *Chem. Commun.*, 2016, **52**, 7288.
- 33 Y. Wu, J. Wang, F. Zeng, S. Huang, J. Huang, H. Xie, C. Yu and S. Wu, *ACS Appl. Mater. Interfaces*, 2016, **8**, 1511.

## 9. $^1\text{H}$ NMR spectra of compounds 1 and 2

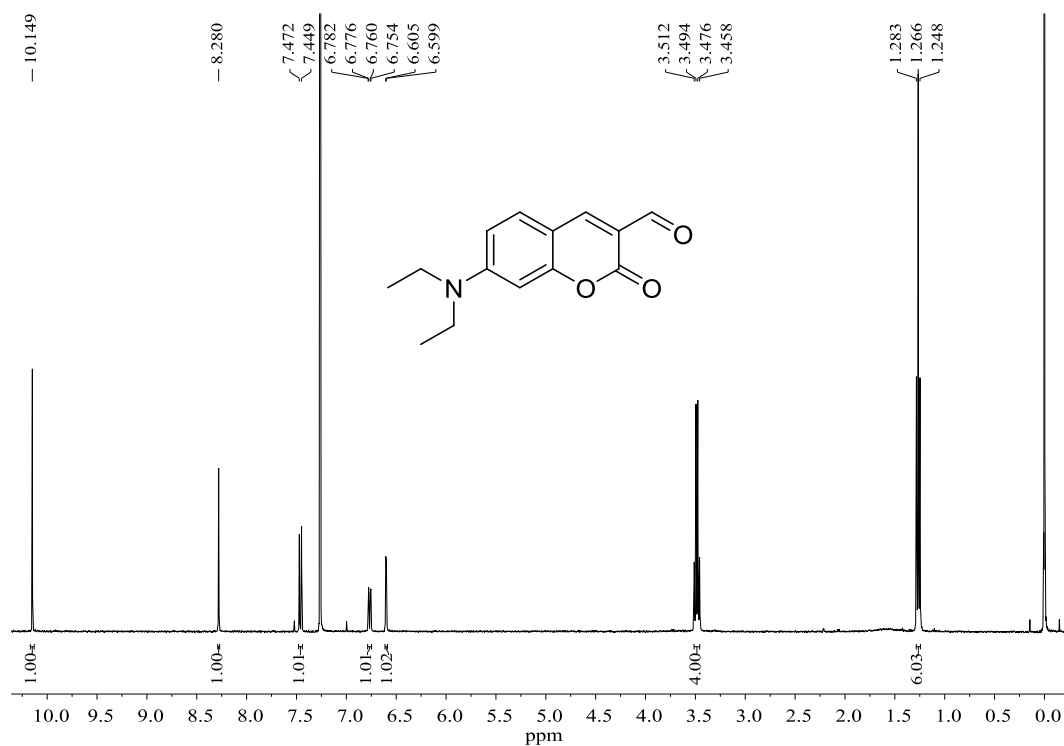

**Fig. S9**  $^1\text{H}$  NMR spectrum of compound 1 in  $\text{CDCl}_3$  (400 MHz).

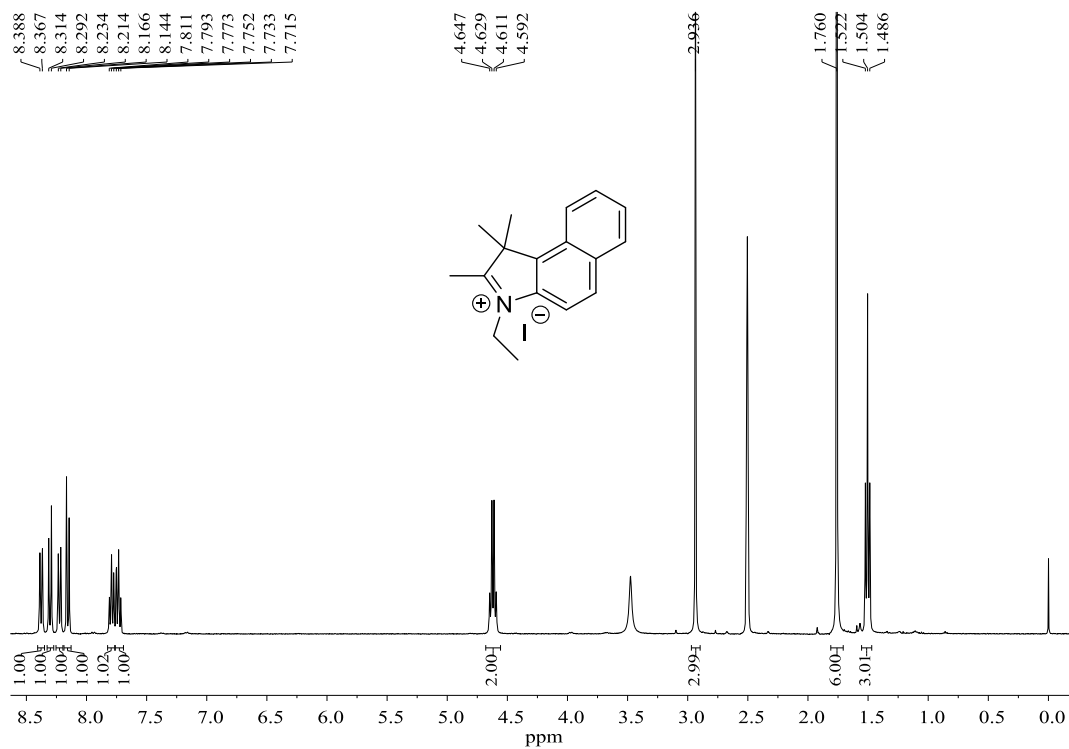

**Fig. S10**  $^1\text{H}$  NMR spectrum of compound 2 in  $\text{DMSO}-d_6$  (400 MHz).
